# Supplementary material
Source: HighWire-hosted journal article supplement (https://lupus.bmj.com/content/10/1/e000870)
Supplement: inline-supplementary-material-1 [file inline-supplementary-material-1.pdf]

## Supplementary Figure 1

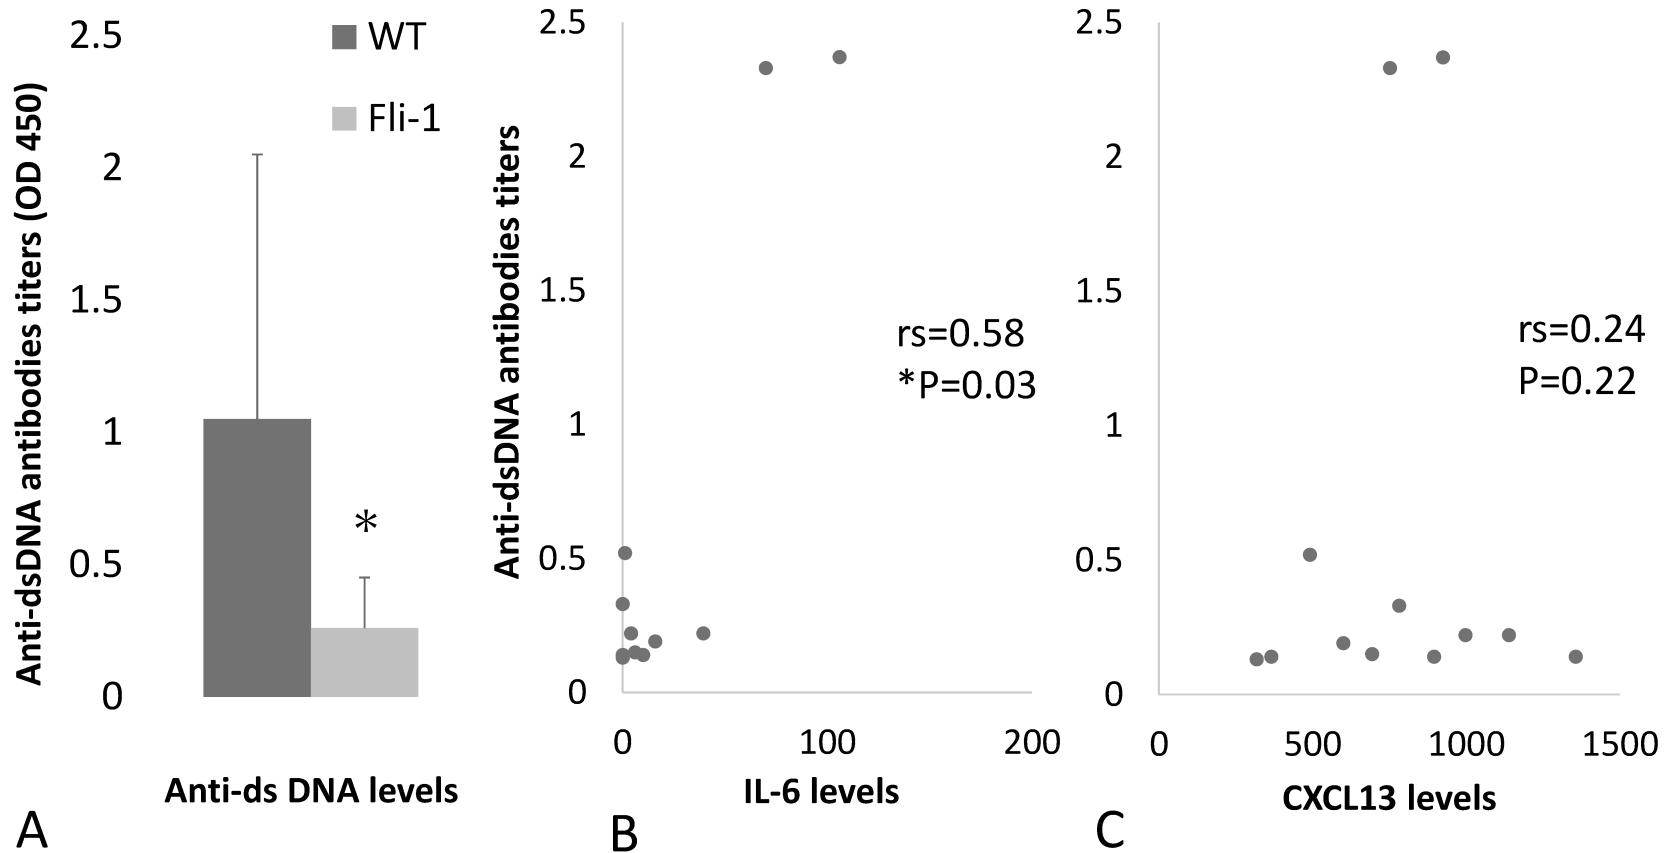

\* p&lt;0.05

Serum CXCL13 concentrations in younger MRL/lpr mice compared to adult MRL/lpr mice  
(Younger: 7-9 weeks old, N = 4)  
(Adult: 21-36 weeks old, N = 9)

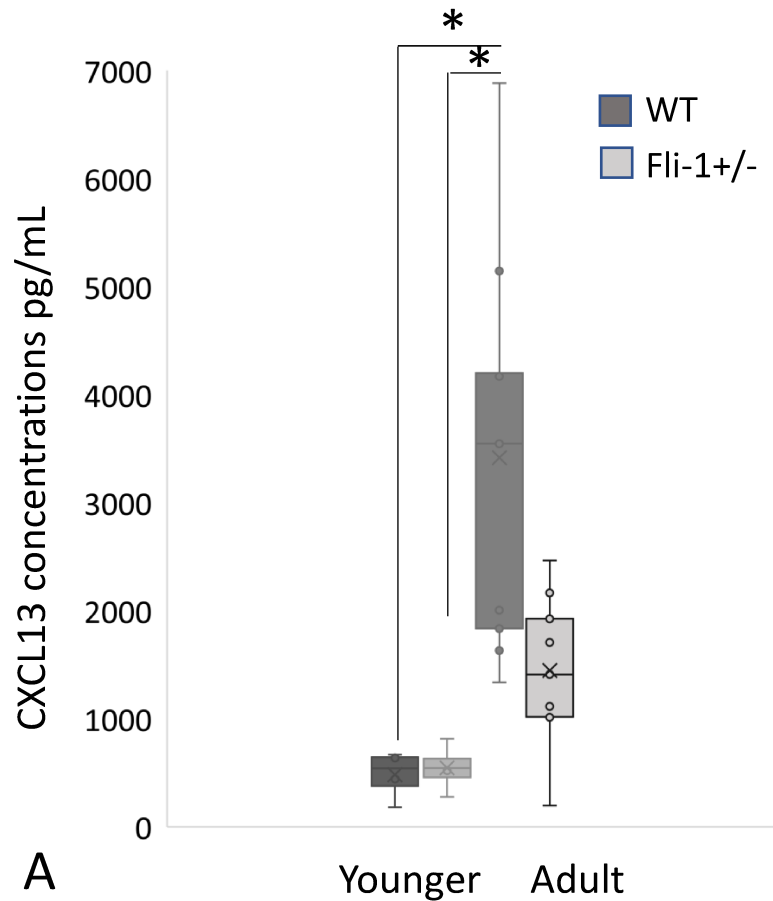

Relative mRNA expression of CXCL13 and CXCR5 in younger MRL/lpr mice  
(7-9 weeks old, N = 3-4)

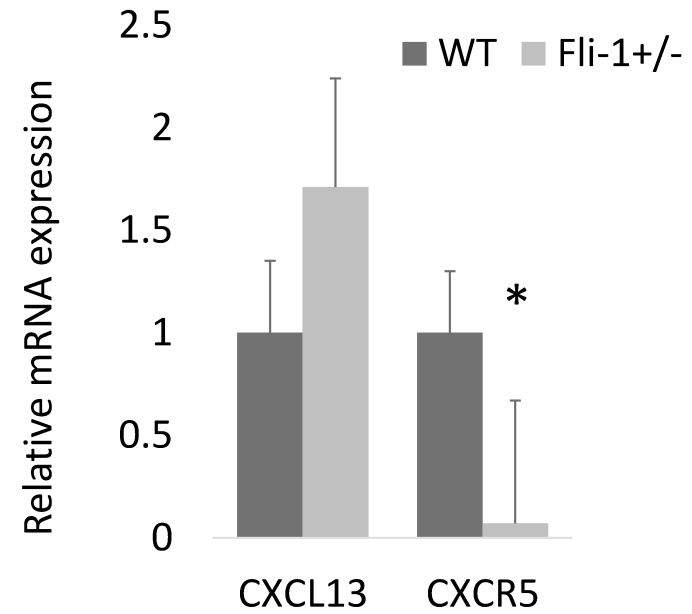

\* p<0.05

# Supplementary Figure 3

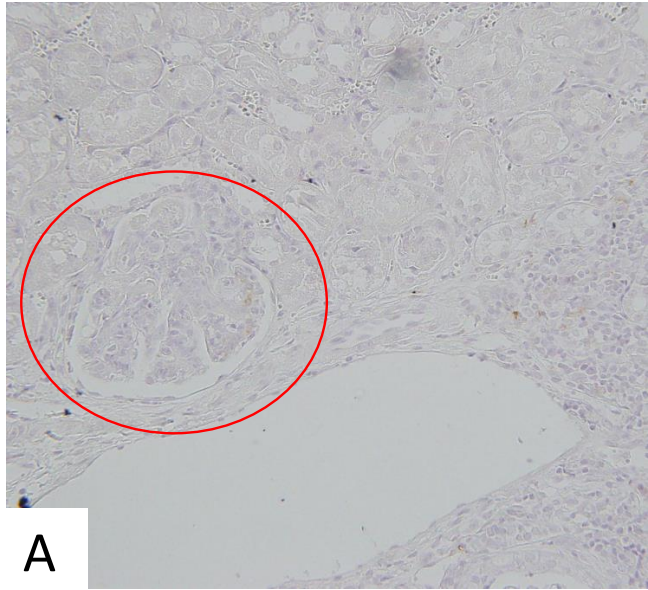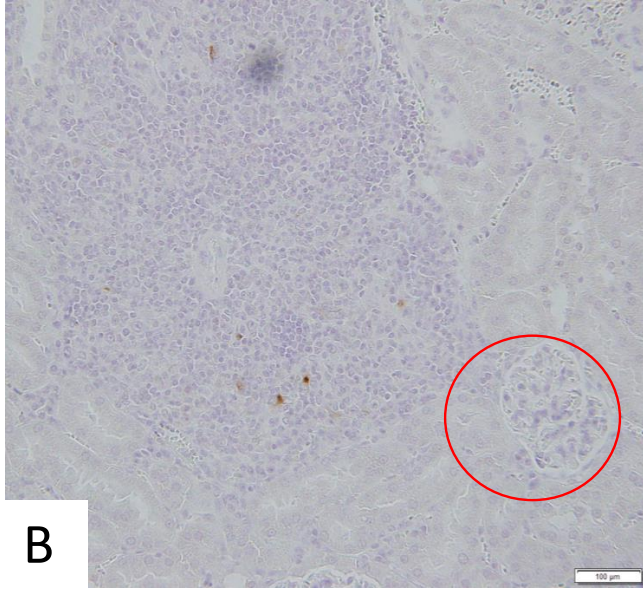

x400

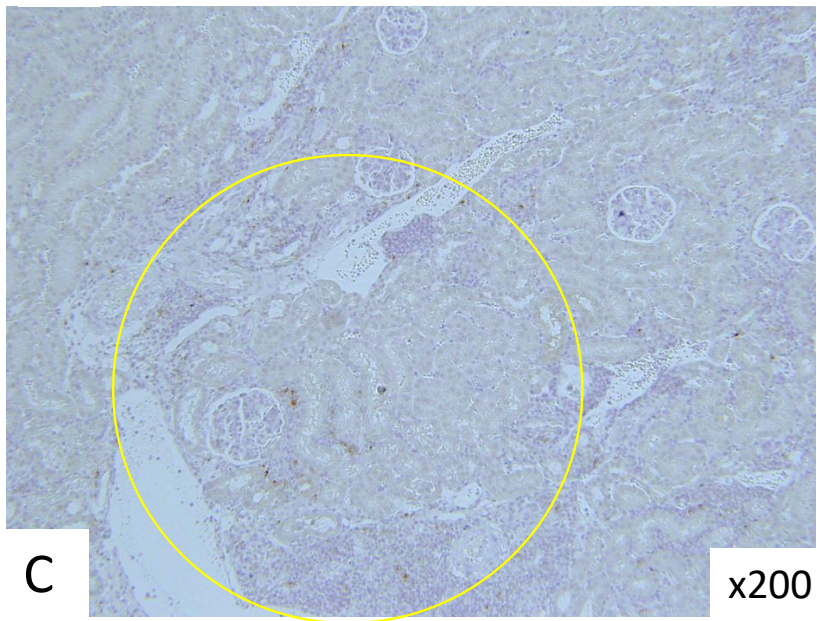

x200

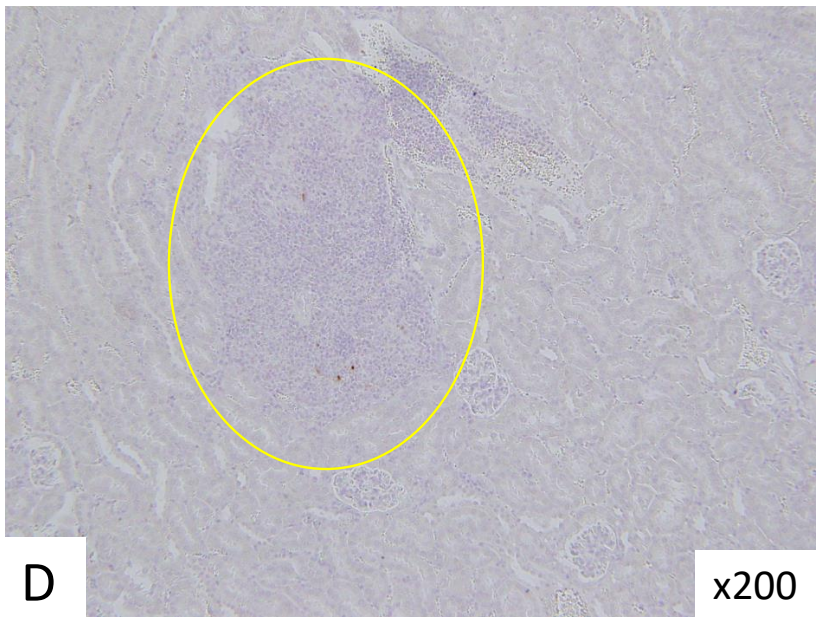

x200

## Supplementary Figure 4

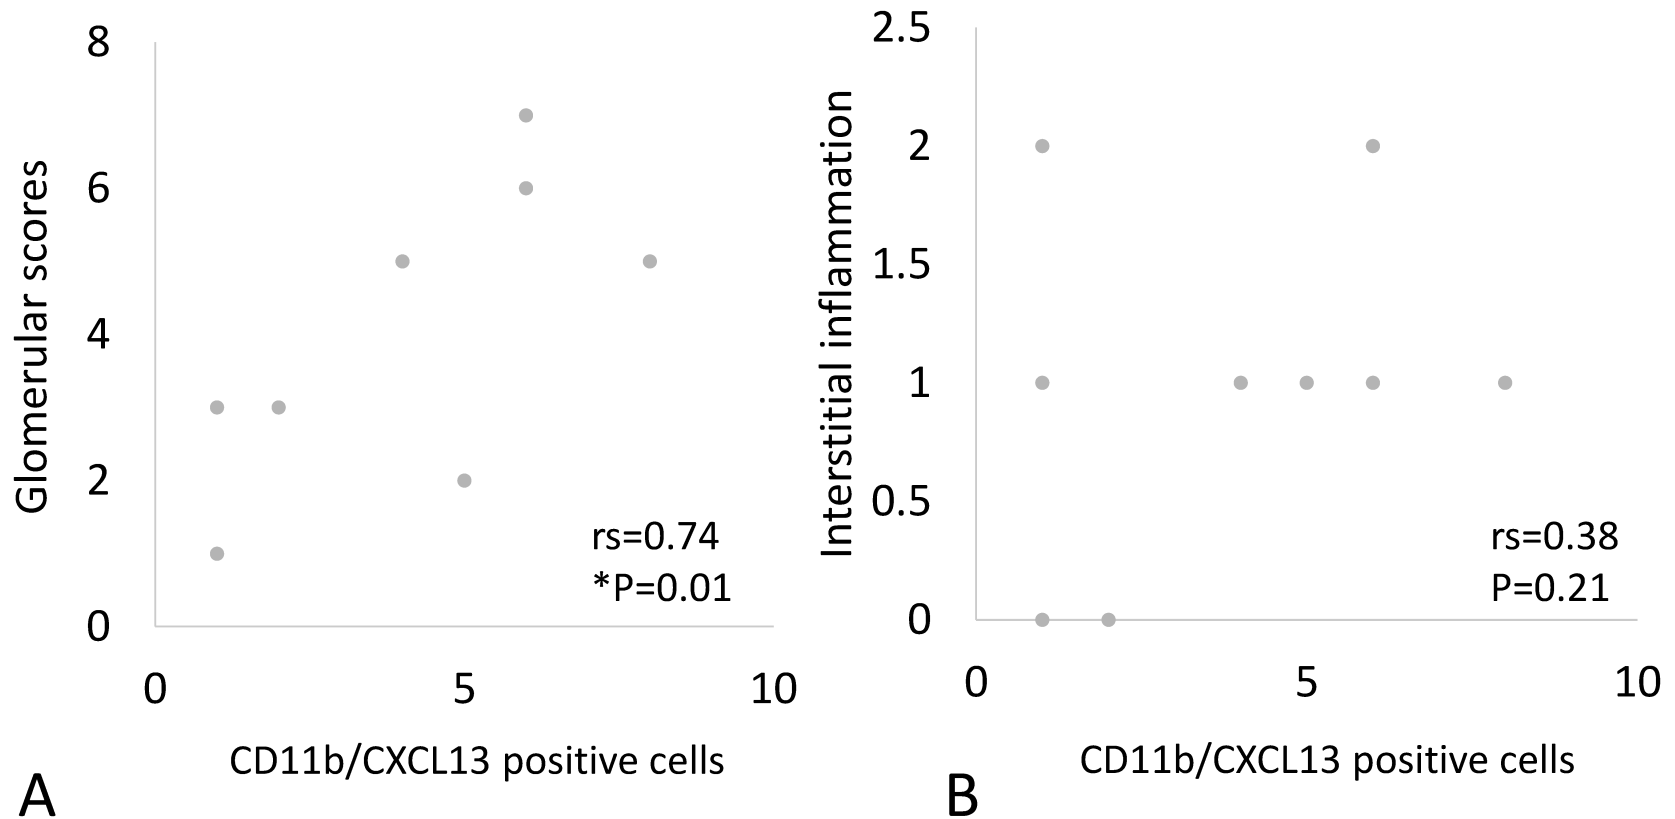\*  $p < 0.05$
